# Supplementary material
Source: HighWire-hosted journal article supplement (https://rapm.bmj.com/content/rapm-2020-101826)
Supplement: inline-supplementary-material-1 [file inline-supplementary-material-1.pdf]

## Appendix A

Database: Ovid MEDLINE(R) and Epub Ahead of Print, In-Process & Other Non-Indexed Citations and Daily <1946 to April 18, 2020>

Search Strategy:

- 
- 1 pericapsular nerve group.ti,ab,kf. [standalone term]
  - 2 Autonomic Nerve Block/
  - 3 nerve block\*.ti,ab,kf.
  - 4 plane block\*.ti,ab,kf.
  - 5 PENG.ti,ab,kf.
  - 6 or/2-5 [nerve block concept]
  - 7 hip/ and (exp Orthopedic Procedures/ or Surgical Procedures, Operative/)
  - 8 hip/su
  - 9 (hip\* adj5 (surg\* or operat\* or orthopedic\* or orthopaedic\* or fractur\* or arthroplast\* or arthroscop\* or relocation or dislocat\* or pain\* or joint\*).ti,ab,kf.
  - 10 ((femur\* or femor\*) adj3 (surg\* or fractur\* or arthroplast\* or arthroscop\* or relocation or dislocat\*).ti,ab,kf.
  - 11 ((trochant\* or petrochant\* or intertrochant\* or subtrochant\*) adj3 (surg\* or fractur\* or arthroplast\* or arthroscop\* or relocation or dislocat\*).ti,ab,kf.
  - 12 ((intracapsular\* or extracapsular\*) adj3 (surg\* or fractur\* or arthroplast\* or arthroscop\* or relocation or dislocat\*).ti,ab,kf.
  - 13 lower extremit\*.kf.
  - 14 (thigh adj4 surg\*).ti,ab,kf.
  - 15 or/7-14 [hip surgeries concept]
  - 16 and/6,15 [joining nerve block and hips]
  - 17 or/1,5,16 [adding in standalone term]
  - 18 limit 16 to yr="2018-Current"
